# Supplementary material
Source: PubMed Central journal article supplement (PMC6909697)
Supplement: Supp_Fig1.pdf [file Supp_Fig1.pdf]

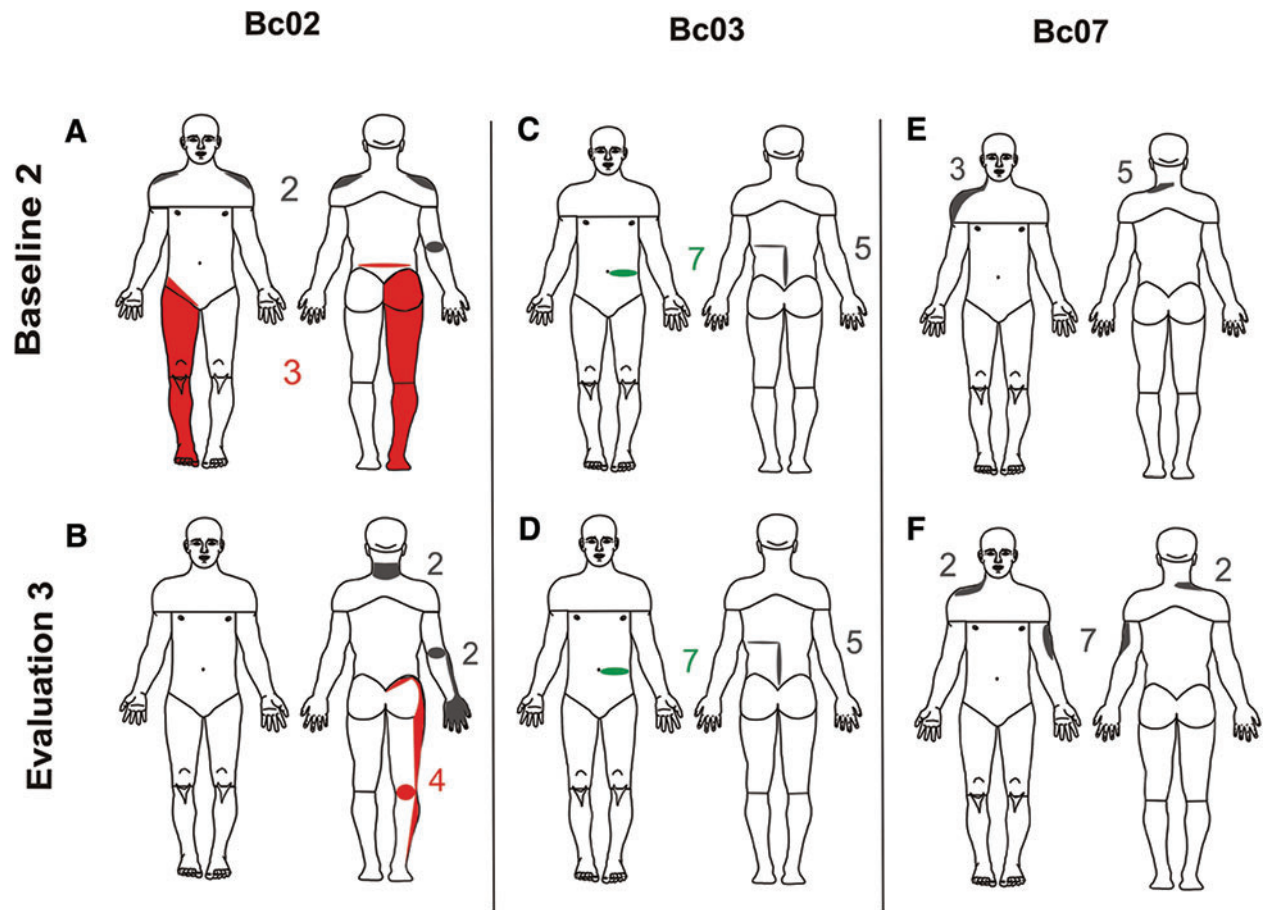

**SUPPLEMENTARY FIG. S1.** Pain drawings from baseline 2 (B2) and evaluation 3 (E3) for 3 participants who experienced pain. Color coding of pains are as follows: musculoskeletal pain (gray), at-level neuropathic pain (green), below-level neuropathic pain (red), and intensities are noted (scale 1–10). (A) At B2, participant BC02 experienced two musculoskeletal pains (bilateral shoulders and right elbow) and one below-level neuropathic pain (right leg and lower back). (B) At E3, musculoskeletal (neck, right elbow/arm/hand) and below-level neuropathic (right leg) pains were present. (C) Participant BC03 experienced musculoskeletal (midline back) and at-level neuropathic (left torso) pains at B2 and (D) these remained constant at E3. (E) Participant BC07 experienced musculoskeletal pains in the neck and right shoulder areas at B2 and (F) in the neck, right shoulder, and right upper arm at E3.
