# Supplementary material
Source: PubMed Central journal article supplement (PMC6909697)
Supplement: Supp_Fig2.pdf [file Supp_Fig2.pdf]

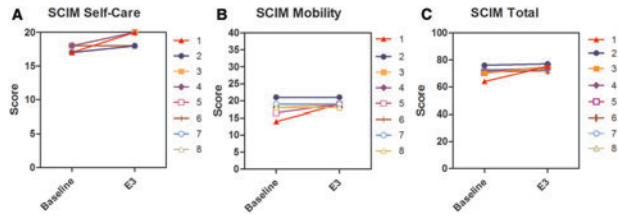

**SUPPLEMENTARY FIG. S2.** Spinal Cord Independence Measure (SCIM) (A) self-care subscale (range of subscale is 0–20), (B) mobility subscale (range of subscale is 0–40), and (C) total scores by participant at baseline and evaluation 3 (E3) (range of total scale is 0–100).
